# Supplementary material
Source: ML conference proceedings conference paper supplement (https://proceedings.neurips.cc/paper_files/paper/2011/hash/2387337ba1e0b0249ba90f55b2ba2521-Abstract.html)
Supplement: Supplementary file [file 2387337ba1e0b0249ba90f55b2ba2521-Supplemental.zip]

# Supplementary materials for the paper: Sparse Recovery with Brownian Sensing

## Proof of Proposition 1

First, we prove a very short Lemma describing some properties of the matrix  $A$ .

**Lemma 1** *Let us consider  $M$  independent Brownian motions  $(B^1, \dots, B^M)$  on  $\mathcal{X}$ , and define the  $M \times K$  matrix  $A$  with elements*

$$A_{m,k} = \frac{1}{\sqrt{M}} \left( \int_{\mathcal{C}} \varphi_k(x) dB^m(x) \right).$$

*Then  $A$  is a centered Gaussian matrix where each row  $A_{m,\cdot}$  is i.i.d. from  $\mathcal{N}(0, \frac{1}{M} V_{\mathcal{C}})$ , where  $V_{\mathcal{C}}$  is the  $K \times K$  covariance matrix of the basis, defined by its elements  $V_{k,k'} = \int_{\mathcal{C}} \varphi_k(x) \varphi_{k'}(x) dx$ .*

*Proof:* Indeed, from the definition of stochastic integrals, each  $A_{m,k} \sim \mathcal{N}(0, \frac{1}{M} \int_{\mathcal{C}} \varphi_k^2(x) dx)$ , and  $\text{Cov}(A_{m,k}, A_{m,k'}) = \frac{1}{M} \int_{\mathcal{C}} \varphi_k(x) \varphi_{k'}(x) dx$ . Thus each row  $A_{m,\cdot} \sim \mathcal{N}(0, \frac{1}{M} V_{\mathcal{C}})$  and are independent by independence of the Brownian motions. Additionally, we have

$$\mathbb{E}[(A^T A)_{k,k'}] = \mathbb{E} \left[ \frac{1}{M} \sum_{m=1}^M A_{m,k} A_{m,k'} \right] = V_{k,k',\mathcal{C}}.$$

□

Now let us define  $B = A V_{\mathcal{C}}^{-1/2}$ . Since each row of  $A$  is an independent draw of  $\mathcal{N}(0, V_{\mathcal{C}})$ , then each row of  $B$  is an independent draw of  $\mathcal{N}(0, I)$ . Thus  $B$  is a matrix with elements i.i.d. from  $\mathcal{N}(0, 1)$ . We thus can use the following result (as stated in [9], see also [14, 1]):

**Theorem 5** *For  $p' > 0$  and any integer  $t > 0$ , when  $M > C' \delta^{-2} (t \log(K/t) + \log 1/p')$ , with  $C'$  being a universal constant, see [14, 1], then with probability at least  $1 - p'$ , there exists  $\delta_t \leq \delta$  ( $\delta_t$  is the RIP constant of  $B$  for  $t$ -sparse vectors) such that for all  $t$ -sparse vectors  $x \in \mathbb{R}^K$ ,*

$$(1 - \delta_t) \|x\|_2 \leq \|Bx\|_2 \leq (1 + \delta_t) \|x\|_2.$$

Since  $V_{\mathcal{C}}$  is symmetric, it is possible to write  $V_{\mathcal{C}} = U D U^T$  with  $U$  an orthogonal matrix and  $D$  a diagonal matrix with the eigenvalues of  $V$  as diagonal elements (SVD decomposition). Thus,  $V^{1/2} = U D^{1/2} U^T$  where  $D^{1/2}$  is the diagonal matrix with the square roots of the diagonal elements of  $D$  (i.e., the eigenvalues of  $V_{\mathcal{C}}^{1/2}$ ).

Note that if  $U$  is an orthogonal matrix,  $BU$  is also RIP with the same constant as  $B$  (see [7] for the preservation of the RIP property to a change of orthonormal basis). Applying this and Theorem 5 with  $\delta = 1/2$  for  $2t$ -sparse vectors, we have that whenever  $M > 4C' (2t \log(K/2t) + \log 1/p')$ , the RIP constant  $\delta_{2t} \leq 1/2$ , i.e. for all  $2t$ -sparse vectors  $x$ ,

$$\frac{1}{2} \|x\|_2 \leq \|B U x\|_2 \leq \frac{3}{2} \|x\|_2.$$

Now if we consider a  $2t$ -sparse vector  $x$ , then  $D^{1/2} x$  is also  $2t$ -sparse with same support as  $x$ , and we also have that  $\nu_{\min,\mathcal{C}} \|x\|_2 \leq \|D^{1/2} x\|_2 \leq \nu_{\max,\mathcal{C}} \|x\|_2$ . Thus the matrix  $B U D^{1/2}$  satisfies

$$\frac{\nu_{\min,\mathcal{C}}}{2} \|x\|_2 \leq \|B U D^{1/2} x\|_2 \leq \frac{3\nu_{\max,\mathcal{C}}}{2} \|x\|_2.$$

As mentioned before, the preservation of the RIP property to a change of orthonormal base (see [7]) can be applied with  $U$  and thus as  $A = B V^{1/2} = B U D^{1/2} U^T$  to obtain:

$$\frac{1}{2} \nu_{\min,\mathcal{C}} \|x\|_2 \leq \|A x\|_2 \leq \frac{3}{2} \nu_{\max,\mathcal{C}} \|x\|_2.$$

## Proof of Proposition 2

We prove here without loss of generality (because of we can always parametrize the curve) the result for  $\mathcal{X} = [0, l]$ . Let us recall that  $f$  is  $(L, \beta)$ -Hölder and that we write  $\sigma = \|\eta\|_2$ . The estimation error  $\varepsilon_m = b_m - \widehat{b_m}$ , given the samples  $(x_n, y_n)_n$ , follows a centered Gaussian distribution (w.r.t. the choice of the Brownian  $B^m$ ) with variance

$$\begin{aligned}
\mathbb{V}(\varepsilon_m) &= \mathbb{V}\left(\frac{1}{\sqrt{M}}\left(\int_0^l f(x)dB^m(x) - \sum_{n=0}^{N-1} y_n(B_{x_{n+1}}^m - B_{x_n}^m)\right)\right) \\
&= \frac{1}{M}\mathbb{V}\left(\int_0^l \left(f(x) - \sum_n \left(f\left(l\frac{n+1}{N}\right) + \eta_n\right)\mathbb{I}_{x \in [l\frac{n}{N}; l\frac{(n+1)}{N}]}\right)dB^m(x)\right) \\
&= \frac{1}{M}\int_0^l \left(f(x) - \sum_n \left(f\left(l\frac{n}{N}\right) + \eta_n\right)\mathbb{I}_{x \in [l\frac{n}{N}; l\frac{(n+1)}{N}]}\right)^2 dx \\
&= \frac{1}{M}\sum_n \int_{l\frac{n}{N}}^{l\frac{(n+1)}{N}} \left(f(x) - f\left(l\frac{n}{N}\right) - \eta_n\right)^2 dx \\
&\leq \frac{1}{MN}\sum_n \left(\frac{Ll^\beta}{N^\beta} + |\eta_n|\right)^2 dx \\
&= \frac{2}{MN}\left(\frac{L^2 l^{2\beta}}{N^{2\beta-1}} + \sum_n |\eta_n|^2\right) \\
&\leq \frac{2}{MN}\left(\frac{L^2 l^{2\beta}}{N^{2\beta-1}} + \sigma^2\right).
\end{aligned}$$

We now wish to apply Bernstein's inequality in order to bound  $\|\varepsilon\|_2$  in high probability. We recall the following result (see e.g. [2]):

**Theorem 6 (Bernstein's inequality)** *Let  $(X_1, \dots, X_M)$  be independent real valued random variables and assume that there exist two positive numbers  $v$  and  $d$  such that:  $\sum_{m=1}^M \mathbb{E}(X_m^2) \leq v$  and for all integers  $r \geq 3$ ,*

$$\sum_{m=1}^M \mathbb{E}[(X_m)_+^r] \leq \frac{r!}{2} v d^{r-2}.$$

Let  $S = \sum_{m=1}^M (X_m - \mathbb{E}(X_m))$ , then for any  $x \geq 0$ , we have  $\mathbb{P}(S \geq \sqrt{2vx} + dx) \leq \exp(-x)$ .

Let us check that the assumptions for applying Bernstein's inequality hold with the choice  $v = 8M(\mathbb{V}(\varepsilon_m))^2$  and  $d = 2\mathbb{V}(\varepsilon_m)$ . Indeed, since the  $\varepsilon_m$  are i.i.d. centered Gaussian, by writing  $X_m = \varepsilon_m^2$ , we have  $X_m \geq 0$  and for any integer  $r \geq 2$ ,  $\mathbb{E}(X_m^r) = (\mathbb{V}(\varepsilon_m))^r \frac{(2r)!}{2^r r!}$ . This gives  $\sum_{m=1}^M \mathbb{E}[X_m^2] = 3M(\mathbb{V}(\varepsilon_m))^2 \leq v$ , and for  $r \geq 3$ ,

$$\sum_{m=1}^M \mathbb{E}[X_m^r] = M(\mathbb{V}(\varepsilon_m))^r \frac{(2r)!}{2^r r!} \leq M(\mathbb{V}(\varepsilon_m))^r \times 2^r r! \leq \frac{r!}{2} v d^{r-2}.$$

We thus apply Bernstein's inequality (and recall that  $\mathbb{V}(\varepsilon_m) \leq \frac{2}{MN}\left(\frac{L^2 l^{2\beta}}{N^{2\beta-1}} + \sigma^2\right)$ ) to obtain that with probability at least  $1 - p$ ,

$$\|\varepsilon\|_2^2 \leq 2\left(\frac{L^2 l^{2\beta}}{N^{2\beta}} + \frac{\sigma^2}{N}\right)\left(1 + 4\sqrt{\frac{\log(1/p)}{M}} + 2\frac{\log(1/p)}{M}\right).$$

## Proof of Theorem 4

Following [10], we define  $\alpha_t > 0$  (respectively  $\beta_t > 0$ ) as the maximal (resp. minimal) values such that for all  $x \in \mathbb{R}^K$  which are  $t$ -sparse,

$$\alpha_t \|x\|_2 \leq \|Ax\|_2 \leq \beta_t \|x\|_2. \quad (4)$$

We now define  $\gamma_t = \frac{\beta_t}{\alpha_t}$  and use Theorem 3.1 of [10] applied to sparse vectors, in the case of  $\ell_1$  minimization, reminded below:

**Theorem 7 (Foucart, Lai)** *For any integer  $S > 0$ , for  $t \geq S$ , whenever  $\gamma_{2t} - 1 \leq 4(\sqrt{2} - 1)\sqrt{\frac{t}{S}}$ , the solution  $\hat{\alpha}$  to the  $\ell_1$ -minimization problem*

$$\min \|a\|_1, \text{ under the constraint } \|Aa - b\|_2^2 \leq \|\varepsilon\|_2^2,$$

*satisfies  $\|\alpha - \hat{\alpha}\|_2 \leq \frac{D_2 \|\varepsilon\|_2}{\beta_{2S}}$ , where  $D_2$  is a constant which depends on  $\gamma_{2t}$ ,  $S$  and  $t$  defined in [10].*

In order to apply this results, we now provide conditions such that (4) holds, as well as an upper bound on the noise  $\|\varepsilon^2\|$ , and a lower bound on  $\beta_{2S}$ .

**Step 1. Recovery Condition:** We recall the results of Proposition 1 and have that (4) holds with  $\alpha_{2t} \geq \frac{1}{2}\nu_{\min, C}$  and  $\beta_{2t} \leq \frac{3}{2}\nu_{\max, C}$  with probability  $1 - p'$  as long as  $M > \frac{C'}{4}(t \log(K/t) + \log 1/p')$ . Thus  $\gamma_{2t} \leq 3 \frac{\nu_{\max, C}}{\nu_{\min, C}} = 3\kappa_C$ .

A sufficient condition for (7) is that  $3\kappa_C - 1 \leq 4(\sqrt{2} - 1)\sqrt{\frac{t}{S}}$ .

By defining  $r = [(3\kappa_C - 1)(\frac{1}{4\sqrt{2}-1})]^2$  (note that  $r$  only depends on  $V_C$ ), condition (7) holds whenever  $t > Sr$ , thus with probability  $1 - p'$ , whenever

$$M > 4C'(2\lceil Sr \rceil \log \frac{K}{2Sr} + \log 1/p'). \quad (5)$$

Note that this condition holds when the number of Brownian motions  $M$  (which can be chosen arbitrarily) is large enough (and does not depend on the number of observations  $N$ ).

**Step 2. Upper bound on  $\|\varepsilon^2\|$ :** This is the result of Proposition 2.

**Step 3. Lower bound on  $\beta_{2S}$**  In order to apply Theorem 7, we now provide a lower bound on  $\beta_{2S}$ .

**Lemma 2** *If*

$$M > C' \log 1/u, \quad (6)$$

*then with probability  $1 - u$  we have:  $\beta_{2S} \geq \frac{1}{2} \sqrt{\max_k \int_C \varphi_k^2}$ .*

*Proof:* Let us define  $i = \operatorname{argmax}_k \int_C \varphi_k^2(x) dx$ . Let us now consider the 1-sparse vector  $a$  such that  $a_i = 1$  and  $a_k = 0$  otherwise. We have:  $(Aa)_m = \int_C \varphi_i(x) dB^m(x)$ . So each  $(Aa)_m$  is a sample drawn independently from  $\mathcal{N}(0, \int_C \varphi_i^2(x) dx)$ .

By applying Theorem 5, with  $S = K = 1$  and  $\delta = 1/2$ , when  $M > C' \log 1/u$ , then with probability  $1 - u$ ,

$$\frac{1}{2} \sqrt{\int_C \varphi_i^2(x) dx} \|a\|_2 \leq \|Aa\|_2 \leq \frac{3}{2} \sqrt{\int_C \varphi_i^2(x) dx} \|a\|_2.$$

And since  $\beta_{2S}$  is the minimal constant such that for every  $2S$ -sparse vector  $x$  (in particular for  $a$ ) we have  $\|Ax\|_2 \leq \beta_{2S} \|x\|_2$ , we deduce that

$$\beta_{2S} \geq \frac{1}{2} \sqrt{\int_C \varphi_i^2(x) dx} = \frac{1}{2} \sqrt{\max_k \int_C \varphi_k^2(x) dx}.$$

□

We now apply Theorem 7 and deduce that when  $M$  satisfies (5) (which implies that (6) also holds) using Lemma 2, with probability  $1 - p' - u$ ,

$$\|\hat{\alpha} - \alpha\|_2 \leq \frac{2D_2\tilde{\sigma}(N, M, p)}{\sqrt{N}\sqrt{\max_k \int_{\mathcal{C}} \varphi_k^2}} \quad (7)$$

Thus from Proposition 2, with probability  $1 - p - p' - u$ ,

$$\|\hat{\alpha} - \alpha\|_2^2 \leq \frac{8D_2^2 \left( \frac{L^2}{N^{2\beta-1}} l^{2\beta} + \sigma^2 \right) (1 + c(p, M))}{N(\max_k \int_{\mathcal{C}} \varphi_k^2)},$$

and from [10], we deduce that if we are able to recover  $4S$ -sparse vectors, i.e., if  $M > 4C'(4Sr \log \frac{K}{4Sr} + \log 1/p')$  then  $D_2 \leq C\kappa_{\mathcal{C}}^2$  where  $C$  can be loosely bounded by 90, see [10] (note that this numerical constant can be greatly improved). The result follows with the choice  $p = p' = u$ .
